# Supplementary material for: Two novel organic phosphorous-based MOFs: synthesis, characterization and photocatalytic properties
Source: Royal Society of Chemistry journal article supplement (doi:10.1039/c8dt04106g), 2018-11-30
Supplement: c8dt04106g1.pdf [file c8dt04106g1.pdf]

## **Electronic supplementary information (ESI)**

### **Two novel organic phosphorous-based MOFs: synthesis, characterization and photocatalytic properties**

Tianyu Zeng, Liwen Wang, Lu Feng, Hailong Xu, Qingrong Cheng\* and Zhiquan Pan\*

Key Laboratory for Green Chemical Process of Ministry of Education, Wuhan Institute of Technology, Wuhan 430073, P. R. China

Corresponding authors:

\*(Q.C.) E-mail: chengqr383121@sina.com

\*(Z.P.) E-mail: zhiqpan@163.com

Total number of pages: 12

Total number of Schemes: 1

Total number of Tables: 4

Total number of Figures: 11

## Physical Measurements

The C, H, N microanalyses were performed with a Vario EL elemental analyzer. Fourier-transform infrared spectra (FT-IR) were got using a Bio-Rad FTS6000 spectrophotometer in the wavelength range of 4000 - 400  $\text{cm}^{-1}$  (KBr pellets). Thermogravimetric analysis (TGA) were measured on a STA 409 PC analyzer in the temperature range of 30 - 900  $^{\circ}\text{C}$  with a heating rate of 10  $^{\circ}\text{C min}^{-1}$  under nitrogen flow. The powder X-ray diffraction (PXRD) experiments were carried out on Rigaku D-MAX2550 ( $\lambda = 0.15417 \text{ nm}$ ) with  $2\theta$  ranging from  $5^{\circ}$  to  $80^{\circ}$  under ambient conditions. The UV-Vis spectrums for the solid state sample were obtained on a HITACHI U-4100 spectrophotometer. The X-ray photoelectron spectra (XPS) were recorded on an ESCALAB250 spectrometer (Thermo-VG Scientific) using Mg  $K\alpha$  radiation (1253.6 eV) and the binding energy values were calibrated with respect to the C (1 s) peak (284.6 eV). Fluorescence spectra were recorded on an F-7000 FL Spectrophotometer with a quartz cuvette (path length = 1 cm).  $\text{N}_2$  adsorption-desorption isotherms of the prepared samples at 77 K were measured to investigate the pore textural natures using a surface area analyzer (ASAP 2460, Micromeritics). The pH values were determined by using a pH detector (Rex Instrument, Shanghai, China). ICP-OES results were obtained on Optima 5300DV from Perkin Elmer. The electron spin resonance (ESR)spectra were detected by using a Bruker EPR A 300-10/12 spectrometer to measure the activated species.

---

## Materials and Methods

All reagents and solvents were used as received from commercial suppliers without further purification. 4,4'-Bis(chloromethyl)-1,1'-biphenyl, triethyl phosphite, 4,4'-bipyridine (99.00%), cupric acetate monohydrate (99.00%) and cobalt (II) acetate tetrahydrate (99.00%) were purchased from Sinopharm Chemical Reagent Co., Ltd. Ultrapure water from a Millipore Milli-Q system was used to prepare aqueous solutions for the two complexes synthesis and for the degradation experiments.

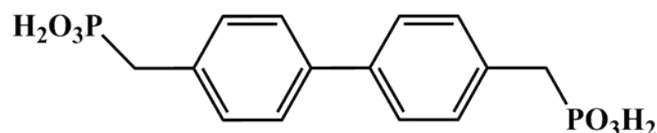

Scheme S1. The structures of ligand H<sub>4</sub>L.

### Analysis of Chromium (VI) reduction

Cr(VI) concentrations were measured using the 1,5-diphenylcarbazide(DPC) colorimetric method by monitoring the purple complex at 540 nm on a UV-vis spectrophotometer. The specific operation for measurement is as follows: In a 50 mL volumetric flask, 2 mL of sample was mixed with 0.5 mL of H<sub>2</sub>SO<sub>4</sub> solution (H<sub>2</sub>SO<sub>4</sub>: H<sub>2</sub>O=1:1) and 0.5mL of H<sub>2</sub>PO<sub>4</sub> solution (H<sub>2</sub>PO<sub>4</sub>: H<sub>2</sub>O=1:1). After adding water to the constant volume, 0.2 mL of freshly prepared 0.25% (w/v) DPC in acetone was added to the volumetric flask. The mixture was then shaken for about 15-30 s and allowed to stand for 10-15 min (for full color development). The red-violet to purple color was measured and the absorbance at 540 nm was denoted as A<sub>i</sub> (i represents different reaction time intervals).

---

## **Experiment of Photoluminescence Spectra (PL)**

•OH radical reactions were performed as follows. 4.00 mg of the photocatalyst was suspended in 40.0 mL aqueous solution containing  $2.00 \times 10^{-3}$  M NaOH and  $5.00 \times 10^{-4}$  M terephthalic acid. Before exposure to light, the suspension was stirred in the dark for 1 h. And then 1.00 mL sample was removed every 10 min and centrifuged for fluorescence spectroscopy measurements. A fluorescence spectrophotometer was used to measure the fluorescence signal of the 2-hydroxy terephthalic acid generated. The excitation light wavelength used in recording fluorescence spectra was 320 nm and the emission wavelength appeared to be  $\sim 426$  nm.

## **Radical Trapping Experiments**

The radical trapping experiments just have one more additional procedure than the MB photocatalytic process: 10 mM radical scavenger need to be added to the system of photogradation before 125 W mercury lamp turned on at room temperature. The specific dosage of t-BuOH, TEOA and NBT are 38.0  $\mu$ L, 53.0  $\mu$ L, and 10mM respectively. The MB concentration changes were monitored by measuring the absorption intensity at its maximum absorbance wavelength of  $\lambda = 664$  nm using a UV-visible spectrophotometer.

**Table S1.** Crystallographic data for complexes **1** and **2**

| <i>Empirical fomula (Formula weight)</i>     | <i>C<sub>19</sub>H<sub>20</sub>CuNO<sub>7</sub>P<sub>2</sub> (499.84)</i> | <i>C<sub>19</sub>H<sub>24</sub>CoNO<sub>9.5</sub>P<sub>2</sub> (539.26)</i> |
|----------------------------------------------|---------------------------------------------------------------------------|-----------------------------------------------------------------------------|
| CCDC deposit no.                             | 1872673                                                                   | 1872661                                                                     |
| Temperature/K                                | 173                                                                       | 297                                                                         |
| Crystal system                               | Square pyramidal                                                          | monoctahedron                                                               |
| Space group                                  | P                                                                         | P 2 <sub>1</sub> /c                                                         |
| a / Å                                        | 10.9957(8)                                                                | 16.6555(15)                                                                 |
| b / Å                                        | 13.1434(10)                                                               | 5.7443(5)                                                                   |
| c / Å                                        | 15.1707(13)                                                               | 22.1480(16)                                                                 |
| α / °                                        | 72.061(3)                                                                 | 90                                                                          |
| β / °                                        | 82.134(3)                                                                 | 94.497(5)                                                                   |
| γ / °                                        | 66.169(2)                                                                 | 90                                                                          |
| V/Å <sup>3</sup>                             | 1907.9(3)                                                                 | 2112.5(3)                                                                   |
| Z                                            | 4                                                                         | 4                                                                           |
| D <sub>calc</sub> /g cm <sup>-3</sup>        | 1.740                                                                     | 1.696                                                                       |
| μ /mm <sup>-1</sup>                          | 1.358                                                                     | 8.321                                                                       |
| F(000)                                       | 1024.0                                                                    | 1112.0                                                                      |
| h, k, l max                                  | 13,15,18                                                                  | 17,5,22                                                                     |
| No. of parameters                            | 541                                                                       | 317                                                                         |
| S                                            | 1.019                                                                     | 1.076                                                                       |
| R <sub>1</sub> , wR <sub>2</sub> [I > 2σ(I)] | 0.0605, 0.0796                                                            | 0.0729, 0.1787                                                              |
| Δρ max/e Å                                   | 0.745                                                                     | 0.745                                                                       |
| Δρ min/e Å                                   | 0.657                                                                     | 0.607                                                                       |

**Table S2.** Selected bond distances (Å) and angles (°) for complex **1** and **2**

| <b>1</b>                |            | <b>2</b>                |            |
|-------------------------|------------|-------------------------|------------|
| <b>Bond lengths (Å)</b> |            | <b>Bond lengths (Å)</b> |            |
| Cu1-O2                  | 1.940(3)   | Co1-O4                  | 2.041(5)   |
| Cu1-O1                  | 1.972(5)   | Co1-O1                  | 2.064(7)   |
| Cu1-O4                  | 1.981(3)   | Co1-O7                  | 2.074(8)   |
| Cu1-N1                  | 2.072(5)   | Co1-O8                  | 2.123(8)   |
| Cu1-O7                  | 2.226(4)   | Co1-N1                  | 2.142(8)   |
| Cu2-O13                 | 1.894(4)   | Co1-O10                 | 2.218(11)  |
| Cu2-O8                  | 1.915(3)   | Co1-O3'                 | 2.240(10)  |
| Cu2-O12                 | 1.979(4)   |                         |            |
| Cu2-N2                  | 2.004(5)   |                         |            |
| Cu2-O14                 | 2.323(5)   |                         |            |
| <b>Bond angles (°)</b>  |            | <b>Bond angles (°)</b>  |            |
| O2-Cu1-O1               | 89.03(15)  | O4-Co1-O1               | 88.53(24)  |
| O2-Cu1-O4               | 166.95(16) | O4-Co1-O7               | 96.00(28)  |
| O1-Cu1-O4               | 88.03(17)  | O4-Co1-O8               | 88.46(24)  |
| O2-Cu1-N1               | 90.65(17)  | O4-Co1-N1               | 91.00(24)  |
| O1-Cu1-N1               | 159.64(18) | O4-Co1-O10              | 156.36(32) |
| O4-Cu1-N1               | 87.72(19)  | O4-Co1-O3'              | 168.05(28) |
| O2-Cu1-O7               | 99.25(15)  | O1-Co1-O7               | 175.30(30) |
| O1-Cu1-O7               | 103.28(15) | O1-Co1-O8               | 94.22(27)  |
| O4-Cu1-O7               | 93.79(15)  | O1-Co1-N1               | 90.46(25)  |
| N1-Cu1-O7               | 96.86(18)  | O1-Co1-O10              | 78.41(34)  |
| O13-Cu2-O8              | 172.77(20) | O1-Co1-O3'              | 97.85(32)  |
| O13-Cu2-O12             | 93.48(18)  | O7-Co1-O8               | 84.68(33)  |
| O8-Cu2-O12              | 89.58(17)  | O7-Co1-N1               | 90.71(31)  |
| O13-Cu2-N2              | 85.26(20)  | O7-Co1-O10              | 96.91(38)  |
| O8-Cu2-N2               | 89.39(19)  | O7-Co1-O3'              | 77.92(34)  |
| O12-Cu2-N2              | 157.29(16) | O8-Co1-N1               | 175.27(33) |
| O13-Cu2-O14             | 93.10(19)  | O8-Co1-O10              | 73.16(33)  |
| O8-Cu2-O14              | 93.20(17)  | O8-Co1-O3'              | 101.06(33) |
| O12-Cu2-O14             | 94.31(15)  | N1-Co1-O10              | 108.53(33) |
| N2-Cu2-O14              | 108.40(17) | N1-Co1-O3'              | 78.92(32)  |
|                         |            | O10-Co1-O3'             | 35.58(37)  |

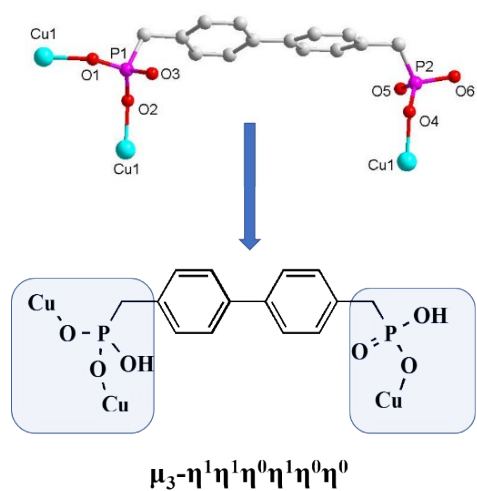

**Fig. S1.** Coordination mode of the ligand in complex 1

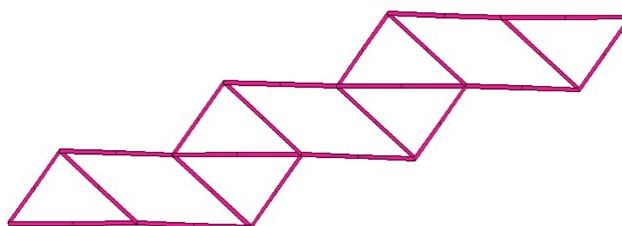

**Fig. S2.** Topological representation of the network of complex 1

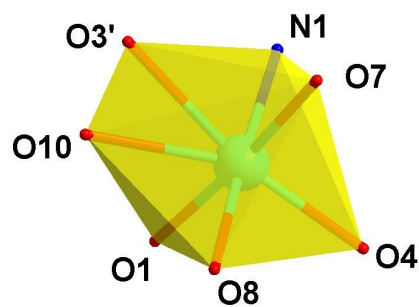

**Fig. S3.** the coordination environment of Co(II) in complex 2

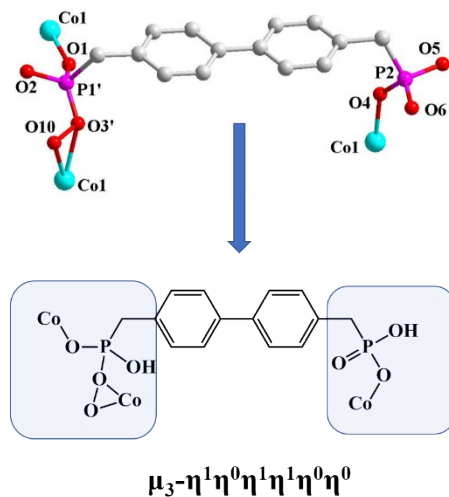

**Fig. S4.** Coordination mode of the ligand in complex 2

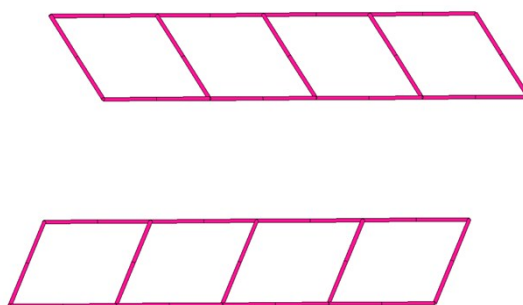

**Fig. S5.** Topological representation of the network of complex 2

**Table S3.** Specific surface areas, pore volumes and mean pore diameters for all samples.

| Sample                                                  | 1       | 2      |
|---------------------------------------------------------|---------|--------|
| Specific surface area (m <sup>2</sup> g <sup>-1</sup> ) | 4.920   | 23.13  |
| Pore volume (cm <sup>3</sup> g <sup>-1</sup> )          | 0.02070 | 0.1103 |
| Adsorption average pore diameter (nm)                   | 16.85   | 19.08  |
| Desorption average pore diameter (nm)                   | 3.232   | 7.065  |



**Table S4.** The ICP result of centre metal ions concentration in MB aqueous solution after photocatalysis

| <i>System</i>  | <i>ICP result</i> | <i>removal rate</i> |
|----------------|-------------------|---------------------|
| With complex 1 | 0.460 mg/L        | 0.360%              |
| With complex 2 | 1.98 mg/L         | 1.80%               |

Photocatalyst: 40 mg; MB: 40 mL, 10 ppm.

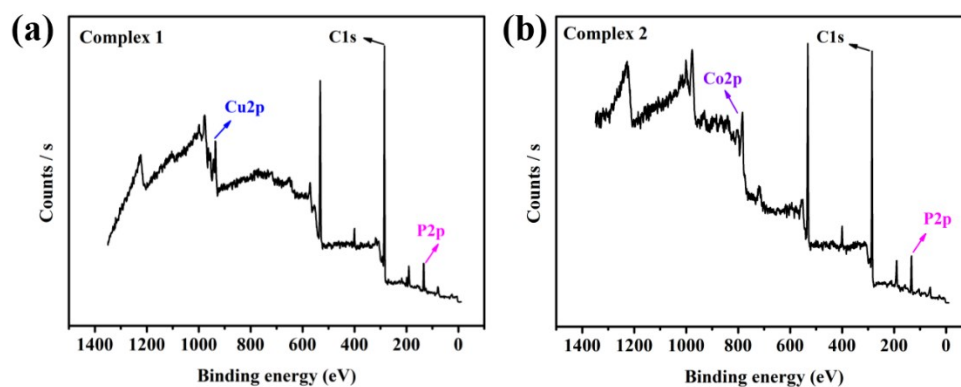

**Fig. S6** XPS spectra for complexes 1 (a) and 2 (b) after photocatalytic degradation of MB: survey spectrum.

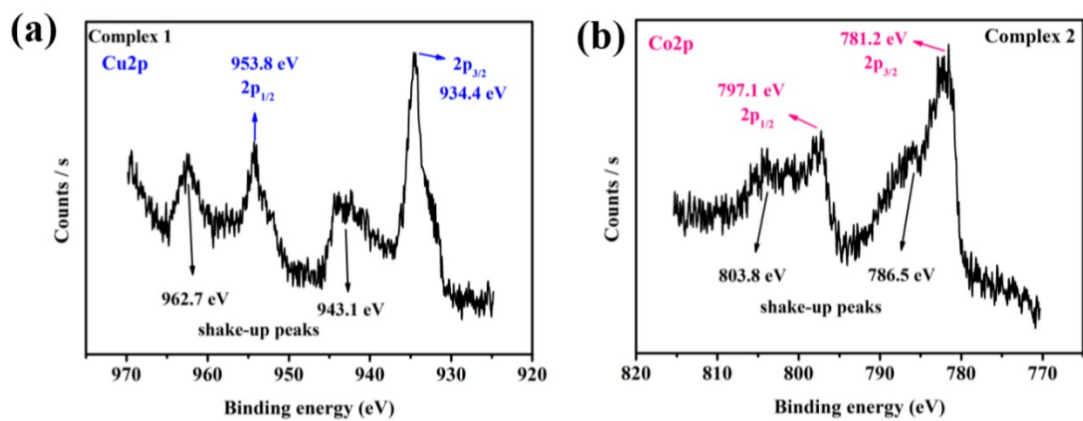

**Fig. S7** (a) Cu 2p spectrum bound to complex 1 after photocatalysis; (b) Co 2p spectrum bound to complex 2 after photocatalysis.

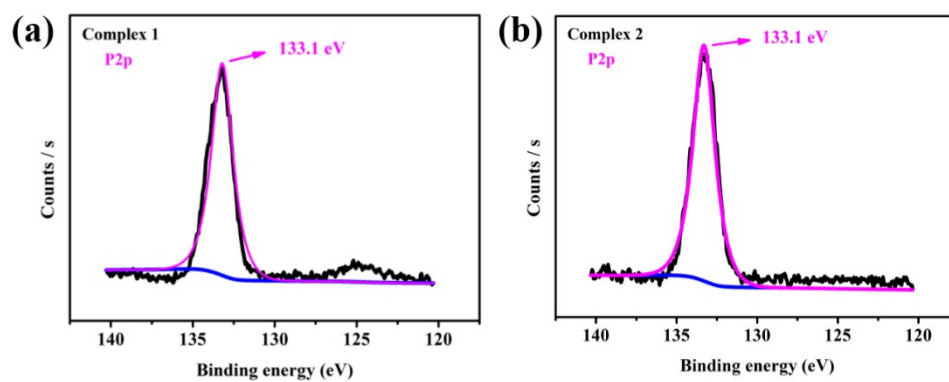

**Fig. S8** P 2p spectrum bound to complexes 1 (a) and 2 (b) after photocatalysis

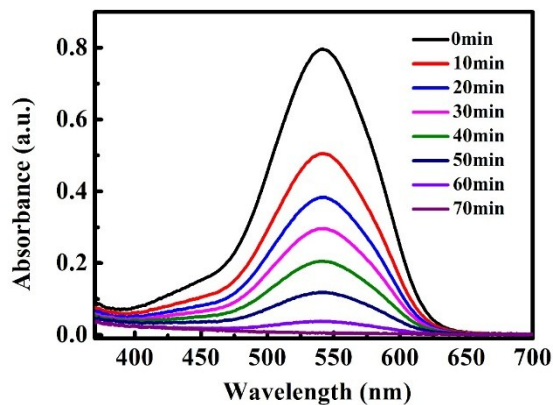

**Fig. S9.** Time-dependent absorption spectra for the photocatalytic reduction of aqueous Cr(VI) over complex 1.

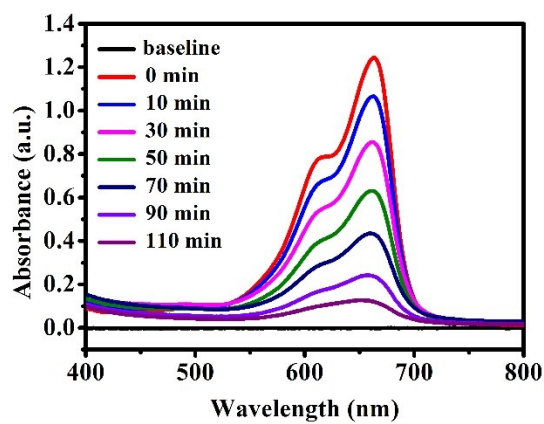

**Fig. S10.** Time-dependent absorption spectra for the photocatalytic degradation of MB over complex 2.

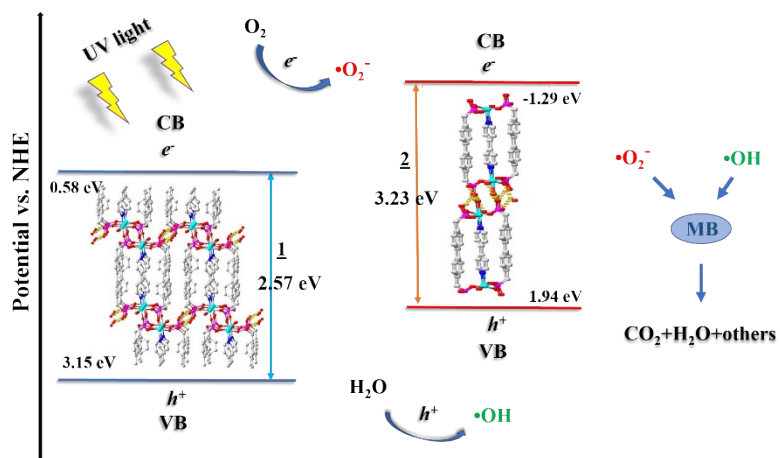

**Fig S11.** A schematic illustration of the energy position and photocatalytic degradation of MB over complexes **1** and **2**.
